## RESEARCH ARTICLE

# Setting a research agenda to improve community health: An inclusive mixed-methods approach in Northern Uganda

Nicholas Dowhaniuk<sup>1,2,3\*</sup>, Susan Ojok<sup>4</sup>, Sarah L. McKune<sup>2,5</sup>

**1** Department of Geography, University of Florida, Gainesville, Florida, United States of America, **2** Department of Environmental and Global Health, University of Florida, Gainesville, Florida, United States of America, **3** Tropical Conservation and Development Program, University of Florida, Gainesville, Florida, United States of America, **4** Uganda Women's Action Program, Gulu, Uganda, **5** African Studies Program, University of Florida, Gainesville, Florida, United States of America

\* [Nick.Dowhaniuk@ufl.edu](mailto:Nick.Dowhaniuk@ufl.edu)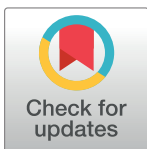

## Abstract

### Background

The United Nations Sustainable Development Goals stress the importance of equitable partnerships in research and practice that integrate grass-roots knowledge, leadership, and expertise. However, priorities for health research in low-and-middle income countries are set almost exclusively by external parties and priorities, while end-users remain "researched on" not "researched with". This paper presents the first stage of a Community-Based Participatory Research-inspired project to engage communities and public-health end-users in setting a research agenda to improve health in their community.

### Methods

Photovoice was used in Kuc, Gulu District, Uganda to engage community members in the selection of a research topic for future public health research and intervention. Alcohol-Use Disorders emerged from this process the health issue that most negatively impacts the community. Following identification of this issue, a cross-sectional survey was conducted using the Alcohol Use Disorder Identification Test ( $n = 327$ ) to triangulate Photovoice findings and to estimate the prevalence of Alcohol-Use Disorders in Kuc. Logistic regression was used to test for associations with demographic characteristics and Alcohol-Use Disorders.

### Results

Photovoice generated four prominent themes, including alcohol related issues, sanitation and compound cleanliness, water quality and access, and infrastructure. Alcohol-Use Disorders were identified by the community as the most important driver of poor health. Survey results indicated that 23.55% of adults in Kuc had a probable Alcohol Use Disorder, 16.45 percentage points higher than World Health Organization estimates for Uganda.

### Conclusions

Community members engaged in the participatory, bottom-up approach offered by the research team to develop a research agenda to improve health in the community.

## OPEN ACCESS

**Citation:** Dowhaniuk N, Ojok S, McKune SL (2021) Setting a research agenda to improve community health: An inclusive mixed-methods approach in Northern Uganda. *PLoS ONE* 16(1): e0244249. <https://doi.org/10.1371/journal.pone.0244249>

**Editor:** Yaobi Zhang, Helen Keller International, UNITED KINGDOM

**Received:** August 7, 2020

**Accepted:** December 7, 2020

**Published:** January 7, 2021

**Copyright:** © 2021 Dowhaniuk et al. This is an open access article distributed under the terms of the [Creative Commons Attribution License](https://creativecommons.org/licenses/by/4.0/), which permits unrestricted use, distribution, and reproduction in any medium, provided the original author and source are credited.

**Data Availability Statement:** Due to ethical restrictions, the qualitative data from this study, including transcripts and photographs, are not available to be shared without restriction. Due to the sensitive nature of these data, approval from both the University of Florida Institutional Review Board ([irb2@ufl.edu](mailto:irb2@ufl.edu)) and the Clarke International University Research Ethics Committee ([ciu-rec@ciu.ac.ug](mailto:ciu-rec@ciu.ac.ug)) is likely necessary. All other raw, de-identified quantitative data are included in the tables and supplemental files of this manuscript.

**Funding:** ND: This work was supported by the National Geographic Society Early Career Grant under Grant #EC-44771R-18 (<https://www.nationalgeographic.org/funding-opportunities/grants/>) and a Tropical Conservation and Development Field Research Grant from the University of Florida (<http://uftcd.org/>). The funders had no role in study design, data collection and analysis, decision to publish, or preparation of the manuscript.

**Competing interests:** The authors have declared that no competing interests exist.

Participants honed in on the under-researched and underfunded topic of Alcohol-Use Disorders. The findings from Photovoice were validated by survey results, thereby solidifying the high prevalence of Alcohol-Use Disorders as the health outcome that will be targeted through future long-term research and partnership.

## 1. Introduction

Public health issues in Low-Middle Income Countries (LMICs) are integral to many of the United Nations Sustainable Development Goals (SDGs) [1], as illustrated by a recent special section devoted to the topic in the official Journal of the American Academy of Nursing, Nursing Outlook [2–5]. Sustainable Development Goal 17.16 outlines the need to "enhance the global partnership for sustainable development, complemented by multi-stakeholder partnerships that mobilize and share knowledge, expertise, technology and financial resources, to support the achievement of the SDGs in all countries, in particular developing countries [6]." However, health and development research remains an area where priorities are set almost exclusively by a researcher's individual interests or by funding organization priorities, while end-users (especially those from marginalized communities) remain "researched on" and not "researched with" [7–11]. Transdisciplinary partnership, multi-stakeholder collaborations, and grass-roots engagement are considered vital to achieving the SDGs [12]. Community-based interventions are an important entry point for primary and preventative health care [13,14], where community leaders, community groups, and village health workers are vital assets in case-detection, management, and prevention of disease and illness, communication of information regarding risk factors, and the reduction of stigma [15–17]. Recent calls from the medical anthropology community have stressed the importance of ground-up, open-ended, community-based research that prioritizes and gives voice to preferences, perceptions and priorities of the community and is adaptive to unanticipated changes in the research agenda, based on community input [18]. Community-Based Participatory Research (CBPR) is a well-established research approach that holds particular promise to improve inclusion of marginalized communities in the processes necessary for progress towards the SDGs [19]. Research that is based on community goals can increase the usefulness and relevance of data collected [20,21], and improve alignment between funding opportunities and community concerns. Inclusive community approaches, including CBPR, are held up as guideposts for ethical health research, yet are often overlooked [22–26].

Community-Based Participatory Research leverages the researcher's theoretical expertise with the invaluable lived experience of community members [27–29]. Community-Based Participatory Research integrates local biopsychosocial models and helps minimize culture-based assumptions that are often inherent in global health research [30], effectively bridging the recognized gap between local and global knowledge [18,31]. Community-Based Participatory Research has increasingly been recognized as an important means of connecting research and practice [32–34]. This method ensures greater community involvement and control in the research process [35], and better identifies and understands the issues of vulnerable and marginalized communities [33].

Photovoice is a participatory method used increasingly in public health research and heralded for its effectiveness in uncovering and empowering community perspectives of health needs and strengths within a community [36,37]. The Photovoice methodology first entails distribution of cameras to community members to document their perspective and life experience, in response to a prompt by the researcher, through photographs. After a designated

period of time, the researcher then conducts interviews and focus groups with participants, where the photographs taken by participants are used to facilitate discussion and reflection on participant and community perspectives of the research prompt. Photovoice is an effective method of communicating ideas across culture and language barriers [38–41] that empowers and gives marginalized and vulnerable populations a voice, and effectively identifies a research issue using a participatory framework [42,43]. Photovoice is a method rooted in the Participatory Action Research (PAR) paradigm [44,45], with theory borrowed from feminist theory and documentary photography [37]. Participatory Action Research differs from other qualitative methodologies in that the primary purpose of PAR is to influence social change through an iterative process of knowledge generation, action, and reflection [45]. Photovoice helps develop "critical consciousness", where reflection through group dialogue and participatory action creates awareness and influences Praxis, defined as informed and reflective collective action to address an issue [46–49].

## Research motivation

This article aims to provide documentation and reflection on the first phase of an evolving research process. Having established the importance of *how and on what topic* research is conducted, we present here findings from a bottom-up approach by which community members were engaged in the selection of a research topic for future public health research and intervention. Indeed, in the spirit of PAR, this process was not initiated solely for academic purposes, but represents the first stage of a long-term CBPR-inspired project to investigate a community selected research topic, with the goal of co-developing a community-based intervention or solution to that health need. As a byproduct of this work and its design, two additional research questions are addressed in this article: 1) using Photovoice, what are the major drivers of health within the Kuc community, including both the health issues that are most detrimental and the community assets that drive/could drive positive health-related change, and 2) given past scholarly criticisms of the Photovoice, does triangulation of those findings with survey-based data, in which a larger group of community respondents answer privately about their perception of health problems and drivers of health within the community, validate concerns identified through Photovoice [50]? Through this process, we conclude that long-term research design, goals, and implementation should more affectively allow for and engage stakeholder and beneficiary input. This process will better serve community health needs, goals, and assets, while simultaneously fostering critical consciousness and community-level engagement.

## 2. Materials and methods

### 2.1. Study area

Kuc (a pseudonym for a village located in Aswa County, Gulu District, Uganda) is located in Northern Uganda in East Africa. The county was the site of a humanitarian crisis during the insurrection of the Lord's Resistance Army in northern Uganda from 1986 to 2006. During the conflict, more than ninety-five percent of the population of Gulu District was forced into Internally Displaced Persons (IDP) camps [51]. The war left a significant mark on human livelihoods in the region, including lasting negative effects on health infrastructure, disease, and disability [52]. Significant investment and concerted efforts in response to the conflict among domestic and international government and non-governmental organizations has resulted in Gulu District being one of the top performing districts in health [53].

While village level census data are not available for Kuc, the 2014 Uganda Census [54] provides details for Aswa County. In 2014, Aswa County had a population of 125,307 people, 58%

of whom were 17 years of age or less. Approximately 39% of the population over 18 years of age was illiterate at that time, and 82.8% lived in temporary dwelling units. Access to community services was varied, with 86.8% of the population within 5km of the nearest public school, 34.7% within 5km of the nearest secondary school, and 72.8% within 5km of the nearest health facility. Mosquito net ownership was high (97.7%), while access to water was most commonly drawn from a borehole (45.2%), household sanitation facilities were common (87.1% own a toilet facility), and the population was largely reliant on subsistence farming as a main source of livelihood (87.5%).

## 2.2. Photovoice

**2.2.1. Establishment of Community-Advisory Board.** Three individuals representing diverse community interests were recruited to a Community Advisory Board (CAB) [55,56]. Identification and recruitment of these board members occurred through informal discussions with community leaders and with community members at community events, with the final selection being made by the research team. Eligibility for CAB selection included having lived in the community since the conflict, being widely connected within and respected by the community, not being a politician, and having a reputation for being responsible and trustworthy. Members of the CAB, which is still a functioning body supporting the ongoing efforts associated with this work, are a head teacher at the primary school, the leader of a local women's organization, and a prominent and well-connected representative of a local non-governmental organization. The CAB represented a voice for the community during the research process [55] to ensure the project was conducted in a culturally sensitive manner. They also provided input, feedback, and verification of the results and interpretation. Finally, they provided important instruction on project direction and served as a general source of community knowledge and counsel.

**2.2.2. Participant selection and photography workshop.** Following other Photovoice studies [57–59], eight participants were selected through purposive sampling to enable in-depth discussion and gain highly contextualized interview data. A summary of participant demographics is presented in Table 1. Five women and three men were selected, ranging in age from 25–50, and representing various geographic areas of the Kuc community. Members of the CAB were asked to recommend individuals who were informed about community issues, were responsible community members, and would take seriously the responsibility of representing the community, and the research team made the final selection based largely on these recommendations. Community Advisory Board members contacted the participants directly to inquire if they would be willing to participate in the project. If the participants expressed interest, they were recruited to attend a participant meeting where enrollment was finalized. By limiting the sample to eight participants, the research team ensured that each participant would have a camera for two weeks, resulting in two groups of four people collecting photos at a time; this approach was necessary given funding constraints and camera availability. A six-hour training session on photography and photography ethics was conducted at the first meeting, which included obtaining written informed consent from the participants for the photography exercise, individual interviews and the focus discussion. Participants were

**Table 1. Summary of participant demographic information.**

| Statistic | Age   | Highest Level of Education Attained | Number of Children | Occupation                                    |
|-----------|-------|-------------------------------------|--------------------|-----------------------------------------------|
| Range     | 25–50 | Primary 2—Secondary 4               | 1–7                | Farmer, beadmaker, boda boda driver, preacher |
| Average   | 39.38 | N/A                                 | 4.88               | N/A                                           |

<https://doi.org/10.1371/journal.pone.0244249.t001>

provided ample time to ask questions. Participants were also trained on how to obtain verbal consent from individuals in a photograph collected by a participant. The theme, "what in your community has a negative or positive impact on your health?", was used as a general prompt for residents to collect photographs that reflect their view of health and health issues. In keeping with Photovoice methods, the theme was specific enough to be directed, but deliberately vague to minimize bias and influence on photographic decisions of participants. Participants collected photographs during December 2018 and January 2019.

**2.2.3. Individual interviews.** Photographs were uploaded to a tablet, and each Photovoice participant was asked to review and select his/her five photographs that best represented community health in Kuc. This narrowed down potential topics, allowed for critical reflection, and ensured ample time to discuss individual photographs without diluting discussion due to an abundance of photographs. Semi-structured interviews were conducted, during which the participant shared his/her interpretations of selected photographs and elaborated on his/her perceptions of community health. The study adapted the SHOWeD method—a set of five questions often used in Photovoice to structure individual interviews used to gain insight into the meaning of photographs collected by participants [37,46]—as a guide for the individual interviews (Table 2). The questions were adapted to the local context to ensure there was accurate translation between English and Acholi. Clarifying questions and probes followed each response to inquire further with the participant. The interviewer did not inquire about any specific topics; probing questions were only used after a topic was first mentioned by the participant, and probes were used consistently across topics across participants once the participant provided that level of information—such as a health problem or strength of the community. Individual interviews lasted between forty-five and seventy-five minutes and were conducted in January and February 2019.

**2.2.4. Focus group.** All eight Photovoice participants came together in one focus groups to discuss the collection of their selected photographs and the health issues that had been identified in the individual interviews. While the themes that emerged from individual interviews were shared with focus group participants, they were asked the same adapted SHOWeD questions, this time referencing all participants photos. In this way, the focus group served as a space to confirm, deny, and complicate interview results, as well as providing a space for the social interaction between group members where new or additional themes could be generated or existing themes problematized. Interactions between participants can serve as an important mechanism for understanding differences in perceptions across demographic characteristics of participants and geographic location of residence in the village. Additionally, in the spirit of CBPR, the focus group discussion was used to ensure that the topic of most importance identified through the analysis of individual interviews aligned with the topic chosen by the group. This ensured that the most important topic would be pursued in the continuing phases of the

**Table 2. Original SHOWeD method questions and the adapted SHOWeD method questions used in this study.**

| Question # | SHOWeD Questions                                     | Adapted SHOWeD Questions                                         |
|------------|------------------------------------------------------|------------------------------------------------------------------|
| 1          | What do we see here?                                 | What do you see here?                                            |
| 2          | What is really happening here?                       | Why did you take this photo?                                     |
| 3          | How does this relate to our lives?                   | How does this relate to your life and the life of your community |
| 4          | Why does this situation, concern, or strength exist? | Why does this situation, concern, or strength exist?             |
| 5          | What can we do about it?                             | What can we do about it?                                         |

<https://doi.org/10.1371/journal.pone.0244249.t002>

CBPR project. The focus group also provided a chance for participants to reflect on health issues and solutions through group dialogue to influence critical consciousness and grass-roots collective action to address an issue. The focus group was conducted at the end of February 2019 and lasted approximately two hours.

**2.2.5. Photovoice data analysis.** Both the individual interviews and the focus group were conducted using a translator, who worked in real-time to translate questions and responses between Acholi and English. Participants spoke in Acholi, their mother-tongue, necessary to ensure maximum proficiency and comfort when speaking. Translation was provided by a trained research assistant, who worked closely with the research team over the course of the project, was also a native Acholi speaker, but was fluent also in English. Individual interviews and the focus group were recorded and the audio recordings were transcribed by the first author and research assistant, with Acholi responses translated orally to the first author by the translator and directly transcribed into English. The qualitative analysis program, NVIVO 12, was then used to thematically code the interviews using two-cycle coding [60,61]. Holistic coding was used for first-cycle coding, where thematic codes were assigned to the data inductively and segment transcripts into dominant health themes, followed by the use of sub-coding as second-cycle coding to further classify primary codes into common themes nested within primary codes [62,63].

**2.2.6. Photovoice data quality and rigor.** Data quality and rigor were managed through memoing and member checking [64,65]. Memoing was used to maintain a written account of the first author's thoughts, perceptions, and observations during all phases of research and to ensure a self-reflexive practice throughout data collection, which is in keeping with the CBPR process. Member checking was used to verify that the interpretation of the researcher matched the meaning that participants expressed through their photographs and interview transcript. Member checking occurred during and after the focus group to minimize bias in focus group dialogue and responses. Instead, the CAB was consulted following individual interviews to help authenticate that the researchers' interpretations coincided with the CAB's understanding of community issues and strengths. The focus group provided an additional chance for the researchers to triangulate their initial interpretations of the data through witnessing group interaction dynamics and testing interpretations.

## 2.3. Quantitative baseline survey

**2.3.1. Survey instrument.** The World Health Organization (WHO) Alcohol Use Disorder Identification Test (AUDIT) was used to screen community members over the age of 18 for Alcohol-Use Disorders in Kuc. The AUDIT is a ten-question, Likert scale survey designed to gauge alcohol consumption and validated for use in a variety of cultural and geographic contexts [66]. Based on published guidelines, respondents are assigned an AUDIT score and then categorized to one of four levels of alcohol use: Low Risk (AUDIT Score 0–7), Hazardous drinking (AUDIT Score 8–15), Harmful Use (AUDIT Score 16–19), and Alcohol dependence (AUDIT Score 20–40).

**2.3.2. Sampling and analysis.** Between September and October 2019, 327 AUDIT surveys were administered. At the start of the study, a household and individual community member list did not exist for Kuc, but a list of household heads was compiled for the purposes of this research through a special request to the Local Council 1 and Rwodi (local village leaders). The list contained a total of 446 households. The household list was digitized, and random numbers were generated in the statistical program R [67] to assign each household a number between 1 and 446. Beginning with household 1 on that list, all individuals 18 years and older were invited to participate until the minimum sample size was met. The sample size was based

on available funding and time for the data collection; however, a minimum sample size was calculated of 309 people to achieve a 90% confidence level with a 4% margin of error. The AUDIT was administered by a trained research assistant using an Acholi translated AUDIT with the first author present to help with the calculation of alcohol units consumed each respondent.

Alcohol consumption was measured in alcohol units, defined as the equivalent of 10 grams of alcohol. For each consumption question, community members were asked about the quantity and type of alcohol they normally consume on a day when they consume alcohol. The Alcohol by Volume (ABV) for common alcoholic beverages consumed in Kuc was estimated based on the ABV denoted on the packaging for recorded alcohol, and through literature on locally brewed alcohol. Common alcohol types consumed within this region include Lujutu (cassava-liquor; 21% ABV [68]), beer (5%, via label), Kwete (sorghum alcohol; 4% ABV [69]), waraji (banana-liquor; 40% ABV via label), and wine (12% ABV [70,71]). Standard containers for alcohol consumption in Kuc were measured (mL) and presented to community members as guides for volumetric estimation. Standard containers included a glass soda bottle (300 mL), large plastic cup (450 mL), sachet (100 mL), small liquor bottle (250 mL), and a large liquor bottle (750 mL). The following formula was used to identify the number of alcohol units consumed by participants for each consumption question:

$$\text{Units} = \text{volume (mL)} * \frac{\text{ABV}}{1000} * 0.789$$

Probability weights were applied to the sample to correct for sampling bias [72] based on population proportions available from the Uganda Bureau of Statistics' most recent census available at the Parish level, including proportion of the population by sex and age groupings of 18–30, 31–59, and 60+. Weighted proportions of Low-Risk, Hazardous, Harmful, and Alcohol-Dependent community members were calculated, along with weighted samples calculated for each of the AUDIT questions. Bivariate and multivariate logistic regression were then used to quantify statistically significant associations ( $p < 0.10$ ) and to calculate unadjusted and adjusted odds ratios for the impact of sex and age group on the likelihood of an individual having an alcohol-use disorder (defined as an individual with a AUDIT score of  $\geq 8$ ).

## 2.4.Ethics

Written informed consent was obtained from each Photovoice participant and AUDIT respondent via a signature or thumb print of the participant, the signature of a witness, and the signature of the researcher obtaining the informed consent. Photovoice participants also consented to their photography being used to demonstrate concepts and results in publication, and received training on photography and ethics, which included information about how to ethically obtain verbal informed consent from any person of whom they wanted to take a photo. This consent of community members who would appear in photos taken by Photovoice participants was required. Participants were trained to respect the privacy of community members who did not want to be photographed. In the photography and training ethics session, situational training was used to help participants identify inappropriate photos or situations they should not capture. Identifying features of all subjects in photographs were blurred in photo-altering software prior to storage on a secure hard drive, and photographs on the digital camera were permanently deleted. This methodology is in keeping with Photovoice and the entire research protocol was approved by the University of Florida Institutional Review Board in the United States (#IRB201702129), Clarke International University Research Ethics Commission in Kampala, Uganda (#IHSU-REC/0088), and the Uganda National Council for Science and Technology (#SS4745).

### 3. Results

Four prominent themes emerged from the eight individual interviews and focus group discussion related to Photovoice: alcohol related issues, sanitation and compound cleanliness, water quality and access, and infrastructure. The four themes were initially generated in the individual interviews, and the focus group discussion provided valuable insight into agreement and disagreement among Photovoice participants, especially related to the spatial location of residence within Kuc. Selected quotations from participants and photographs are used to illustrate the themes identified in interviews. Participants felt alcohol-related issues were the most serious health issue facing Kuc. The three-hundred and thirty-seven AUDIT surveys confirmed the high levels of alcohol-use disorders in Kuc, especially among men.

#### 3.1. Photovoice

**3.1.1. Alcohol related health impacts.** Alcohol-use was a common theme and the most common discussion point across all photos. During individual interviews, every participant identified alcohol as the greatest health issue facing Kuc, which was confirmed during group discussion in the focus group. Concerns related to alcohol included both the direct consequences of consumption and tangential influences on health, including impacts on family life, planning for the future, living with HIV/AIDS, and sanitation and home-dwelling repair.

Alcohol has a profound impact on relationships and family dynamics in Kuc. As a result of excessive alcohol consumption, family separation, domestic violence, and the early death of family members due to excessive alcohol consumption weighs heavily on both domestic and community life.

*Husband and wife are getting separated because of alcohol. . . I lost one of my brothers due to alcohol. He used to drink so much that he started vomiting out blood. We stopped him from drinking alcohol, but he drunk until he breathed his last breath.*

-Participant #1, Individual Interview, Female

The relatively large amount of income directed towards alcohol in some families has also caused problems in Kuc and can also influence fighting between spouses and negatively impact children.

*Because the husband drinks all the money, the wife asked him to provide money to buy sauce, to which the husband says he doesn't have money. They began fighting, and the woman, because she was angry with the man, although she had money, she refused to pull out her money to buy sauce for the children. That means that domestic violence will always affect kids.*

-Participant #8, Individual Interview, Male

There was also a worry among participants about the impact alcohol has on families to function and plan for the future, noting alcohol's contribution to the lack of sanitation facilities or poor compound upkeep.

*There are community members who drink, and they don't have any plan to make their compound better. The only plan that they have is to wake up in the morning and go and drink, without having to construct a bathroom, a toilet, or cleaning their compounds.*

-Participant #3, Individual Interview, Female



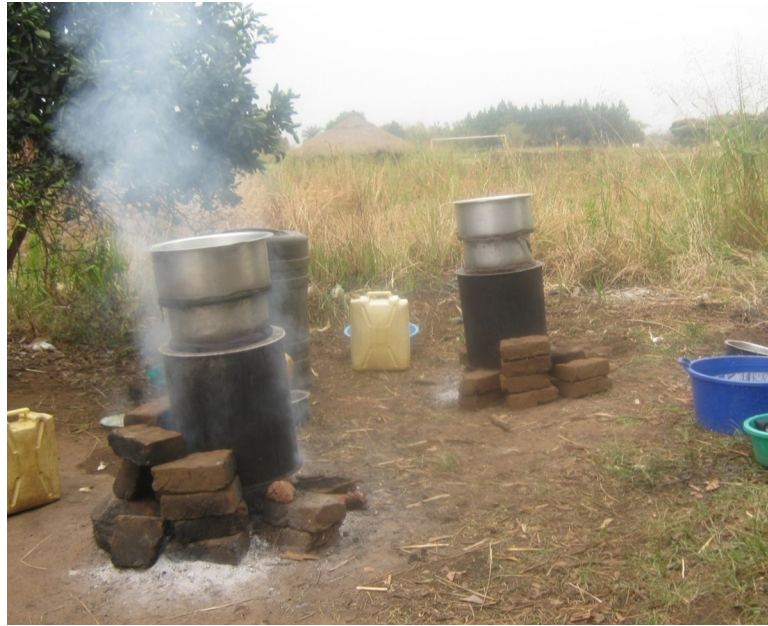

**Fig 1. An example non-recorded alcohol being brewed in the village.**

<https://doi.org/10.1371/journal.pone.0244249.g001>

Even participants who were themselves brewers of the local alcohol consumed by community members were worried about alcohol's negative impacts (Fig 1). Community-brewed alcohol is termed "nonrecorded alcohol", since it is not measured or monitored due to its exclusion from data on tax, sales, and production. The money from brewing is used to fund school fees and other household responsibilities, but the wide availability of cheap, locally brewed alcohol means it is readily available in Kuc.

Participants described their displacement during the war in IDP camps as having changed drinking habits within Kuc, with community members drinking higher-alcohol content liquor during and after living in the camps. Additionally, community members began drinking at higher rates earlier in the day.

*Before people came into the camp, the drinking was mild. The type of alcohol that the elders used to drink was mild. It was not the type of alcohol that would make you crazy. It was an organized type of drinking that was usually done after farming a large piece of a garden. It was a kind of drinking that was in appreciation of hard work from a group of people farming together.*

-Participant #6, Focus Group, Female

Participants also describe alcohol as having contributed to an increase in HIV prevalence in the community through increased sexual promiscuity and risky sexual interactions, highlighting an interaction between what is traditionally considered a non-infectious disease (alcohol-use disorder) and an infectious disease (HIV/AIDS).

*Alcohol makes you think you are great and can do everything. I blame the rate of increased HIV on alcoholism. . .It is not only a problem within Kuc, it is a problem within Uganda.*

-Participant #8, Focus Group, Male

Upon inquiring about solutions to alcohol related issues in Kuc, participants generally did not favor prohibition, but rather indicated a desire to limit the timeframe when alcohol is legally consumed, or to implement more punitive solutions, such as arrest for public intoxication.

**3.1.2. Water quality.** Water quality and access were also presented as serious issues in Kuc, but varied based on the geographic location where individuals lived within Kuc. During the focus group discussions, participants disagreed about the extent of water quality issues, however, the participants who did experience issues in water quality and access often experience severe gastrointestinal illness, as a result. Participants agreed in the focus group that water quality and access varied based on the participant's residential location within the village.

The main issues regarding water quality stem from broken boreholes and multi-use water sources. Boreholes break when the pump is mis-used, parts are stolen for agricultural activities, or poor-quality repairs are made. Participants speculated that mechanics deliberately repair wells poorly to ensure profit from future repairs. In such cases, even when a community has a borehole in their environs, lack of proper maintenance and theft means community members must trek further to another borehole or obtain water from streams and other open waterbodies. When safe water collection points are not available, water is collected in streams where other people are simultaneously bathing, washing clothing, commuting through the stream, and where animals use the stream to cool down or drink water.

*In that picture, those girls standing right there are fetching that water for drinking. . . There are children bathing, and this very man is moving across carrying his bicycle. I found it inappropriate for people to be drinking that water. It might cause them disease.*

-Participant #1, Individual Interview, Female

Despite obtaining water from collection points where water quality is poor, participants also indicated that water is not properly boiled after collection. In such cases, community members are either not aware of the health benefits of boiling water or prefer the taste of non-boiled water. Similarly, water storage containers are often not properly cleaned, resulting in the contamination of boiled water.

Solutions to water quality and access issues solutions the community members put forward included building new boreholes where there is a lack of clean water, employing a trusted caretaker to ensure proper use and maintenance of boreholes, and creating a bylaw to govern proper use of boreholes through a fine for those who misuse or break boreholes.

**3.1.3. Sanitation and compound maintenance.** Participants felt sanitation and proper hygiene to be important for the maintenance and promotion of good health in Kuc. Participants focused much of their discussions of sanitation and compound maintenance on proper sanitation structures and tools in family compounds, including the importance of a well-built latrine to control fecal waste (Fig 2).

*If you have a latrine, it's easy to control the wastes around the home, especially the fecal waste. Usually, when you have kids around and you don't have a latrine, they have a tendency to go and pass stool everywhere and it may be hard to control the flies that come around to the feces. Flies will come on the feces and again drop in your drinking water, drop in your food. During the mango seasons, the children will pick the mangos even nearest to the feces, and that might cause fever to the children.*

-Participant #2, Individual Interview, Male

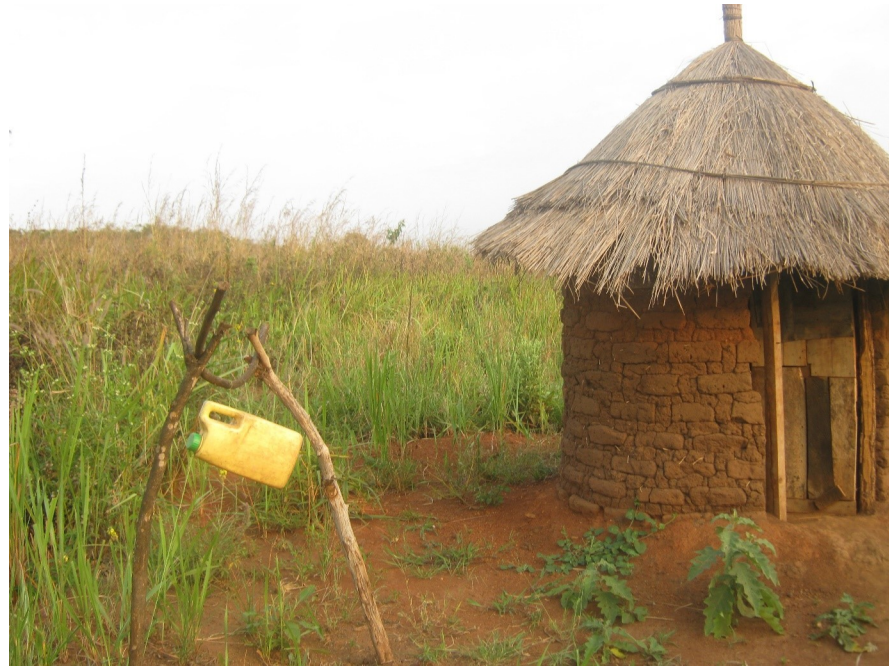

**Fig 2. An example of a proper sanitation set up, with a well-constructed latrine and hand washing station.**

<https://doi.org/10.1371/journal.pone.0244249.g002>

In addition to latrines, participants stressed the importance of other sanitation items, including dish drying racks and rubbish pits to prevent the spread of disease by elevating eating utensils and allowing dishes to dry to kill waterborne pathogens. In addition, slashing of grass near the compound was considered vital to reducing the chance of having a snake bite. One of the participants recently lost an infant family member due to a snake bite, where the snake was hiding in the long grass near a latrine, highlighting the impact of compound maintenance on family health and safety.

Participants commented that sanitation issues could best be addressed through community sensitization, where community experts teach other community members on proper latrine, dish drying rack, hand washing station and rubbish pit construction and maintenance. Additionally, they believe continued and increased enforcement of current bylaws requiring sanitation items to be necessary.

**3.1.4. Infrastructure.** Poor infrastructure also emerged as a common theme among participants responses, although this varied by the location of residence of respondents, largely driven by inconsistent road quality. Disagreement among participants in the focus group regarding the quality of roads and the significance of this issue for community health was observed. Individuals who lived near the graded main road expressed satisfaction with road quality. However, individuals who lived in parts of the village away from the road were adamant about its poor quality and the impact of that reality on their life. Poor road access to the town center results in individuals taking dangerous measures to shorten their trip, such as crossing a flooded swamp or river to get home and can make it more difficult for them to access health and education centers. Infrastructure is also in desperate need of repair, with dangerous roads for motorcycles to pass, leading to fatal accidents (Fig 3). Potential solutions to fix infrastructure related issues were political in nature. Participants expressed the need for community members to advocate for the repair of roads by pressuring leaders.

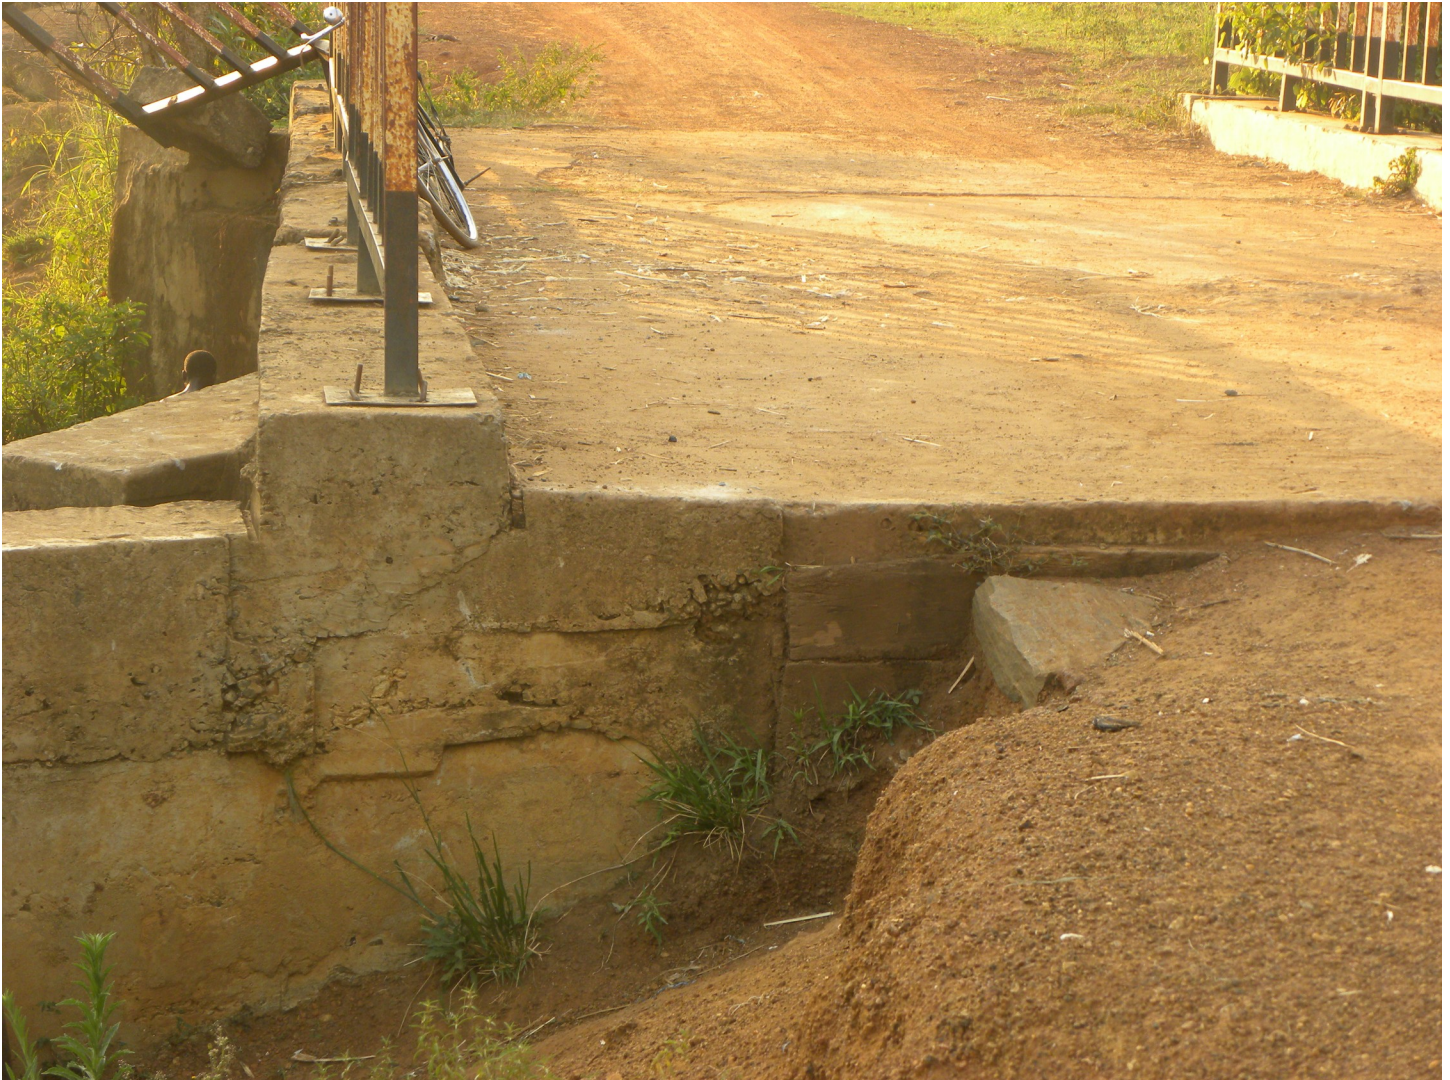

**Fig 3. An example of deteriorating infrastructure.** In this example, the respondent detailed numerous accidents that have occurred due to this degraded bridge on a busy road.

<https://doi.org/10.1371/journal.pone.0244249.g003>

*This is a very big bridge. . .but this side has a big hole that is a danger to people's lives. . .There were two motorbikes that were coming from Gulu Town that fell there. . .They were taken to the hospital. This is a great hazard to our lives.*

-Participant #6, Individual Interview, Female

**3.1.5. Community strengths.** In addition to highlighting the major health issues in their community, participants were asked to identify what they saw as strengths within their community with regard to improving health. Participants provided examples of community efforts to mitigate negative health influences in Kuc, including community-based interventions to curb negative health behavior, and efforts of community members and village health workers to help vulnerable individuals maintain proper sanitation infrastructure within their compounds. Community institutions, such as schools, also play a vital role in influencing parent's

behavior, including saving money for school fees and encouraging them to spend less money on alcohol and more on their children.

*I want to commend the work of the school in reducing the consumption of alcohol. Whenever there is a school meeting. . .there are parents who come drunk. Not only coming drunk, there are other parents who could not clear their children's school fees for the term. And, when they come for school meetings, the leadership of the school disciplines the. . .There are times when each parent drinks 1000 shillings each day and cannot afford to pay an examination fee of 5000. Such examples were given to those parents who drink so much, and they were able to save 1000 shilling to pay for their children's examination fee of 5000 shillings.*

-Participant #8, Individual Interview, Male

Community members and community groups were highly active in addressing issues related to sanitation and household maintenance. For instance, Non-Governmental Organizations (NGOs) periodically train certain community members on proper sanitation habits, and the trained community members become community advocates using their new expertise.

*Within this community, we have elected lead persons to head the campaigns of having a clean home. The lead persons are going to receive training, and they are the people who are going to come back to the community and teach the community how to build the latrines.*

-Participant #6, Individual Interview, Female

Village Savings and Loans Associations (VSLA) have been adapted to help elderly and disabled community members ensure their compounds have proper latrines, drying racks, and that the compounds are properly cleaned every month. Members also help each other clean their compounds and build important sanitation items. Village Savings and Loans Associations are used to buy construction items in bulk, such as iron sheets, to save money for the community as a whole. Punitive measures are used to ensure members are following village health codes, including withholding savings payouts.

*Not only is [the savings group] improving the cleanliness of the families, but it is also making women save more. Last year, they came into my compound, which they do every Thursday, and make sure your compound is cleaned. Everything is cleaned, from the bathroom, the house, the compound, everything is left cleaned. And they are also saving to buy tin roofs, like iron sheets, to build more permanent houses. . .In our savings group, when we come to your home, and you have only one hut, meaning you don't have a different hut for boys and girls, even if you were to be number one on the list to get your savings, we shall put your name at the back, until we find that everything is in order. We want a boy from twelve years to have their own hut, and all the other small things, like the bathroom, the toilet, the rubbish bin, things for putting plates, should be on your compound.*

-Participant #1, Individual Interview, Female

The sub-county and VHT are also actively involved in sanitation. Government officials visit village compounds to inspect for proper sanitation systems. Occasionally, gifts are given to residents who have exceptionally clean and well-maintained compounds, while punitive measures are enforced against those who do not. When someone does not have a latrine, the sub-county will build a latrine, but will confiscate an asset, such as livestock, to pay for building expenses.

**Table 3. Prevalence (%) of alcohol-use disorders in Kuc, based on the Alcohol Use Disorder Identification Test (AUDIT).**

| Demographic Segment      | Low Risk or Abstinence (90% C.I) | Harmful Use (90% C.I) | Hazardous Use (90% C.I) | Alcohol Dependence (90% C.I) |
|--------------------------|----------------------------------|-----------------------|-------------------------|------------------------------|
| <b>Total</b>             | 76.45% (72.39–80.09)             | 4.28% (2.78–6.53)     | 8.26% (6.08–11.12)      | 11.01% (8.48–14.18)          |
| <b>Sex</b>               |                                  |                       |                         |                              |
| Women                    | 91.13% (86.80–94.13)             | 1.55% (0.58–4.07)     | 4.17% (2.27–7.54)       | 3.16% (1.57–6.25)            |
| Men                      | 58.67% (52.22–64.84)             | 7.30% (4.60–11.41)    | 13.36% (9.56–18.37)     | 20.66% (15.93–26.35)         |
| <b>Age Group</b>         |                                  |                       |                         |                              |
| 18–30                    | 80.07% (73.96–85.04)             | 3.13% (1.46–6.59)     | 7.50% (4.59–12.03)      | 9.30% (5.99–14.15)           |
| 30–59                    | 71.73% (65.34–77.35)             | 4.93% (2.74–8.72)     | 9.19% (6.00–13.83)      | 14.15% (10.10–19.47)         |
| 60+                      | 69.98% (56.77–80.54)             | 6.89% (2.62–16.88)    | 11.30% (5.32–22.43)     | 11.83% (5.66–23.06)          |
| <b>Age Group and Sex</b> |                                  |                       |                         |                              |
| <i>Women</i>             |                                  |                       |                         |                              |
| 18–30                    | 94.74% (88.49–97.68)             | 1.32% (0.28–5.94)     | 2.63% (0.84–7.91)       | 1.32% (0.28–5.94)            |
| 30–59                    | 89.41% (82.17–93.93)             | 1.18% (0.24–5.48)     | 4.71% (2.04–10.50)      | 4.71% (2.04–10.50)           |
| 60+                      | 84.62% (66.98–93.72)             | 3.85% (0.71–18.37)    | 7.69% (2.20–23.62)      | 3.85% (0.71–18.37)           |
| <i>Men</i>               |                                  |                       |                         |                              |
| 18–30                    | 65.00% (55.14–73.73)             | 5.00% (2.13–11.27)    | 12.50% (7.33–20.51)     | 17.50% (11.24–26.22)         |
| 30–59                    | 53.75% (44.28–62.96)             | 8.75% (4.71–15.68)    | 13.75% (8.45–21.60)     | 23.75% (16.65–32.70)         |
| 60+                      | 55.00% (36.71–72.03)             | 10.00% (3.26–26.80)   | 15.00% (5.99–32.81)     | 20.00% (9.09–38.46)          |

<https://doi.org/10.1371/journal.pone.0244249.t003>

It is through these community-based measures that members of Kuc hold each other accountable to creating a healthier and safer community.

### 3.2. Quantitative baseline survey

A total of 327 individuals completed the AUDIT survey, including 187 females and 140 male participants. The age of participants ranged from the age of 18–87 (mean 39; standard deviation (SD) 16; median 37). Internal consistency was excellent, with a Cronbach's alpha of 0.93. A description of participants AUDIT classifications is presented in Table 3. Most community members (76.45%) were abstinent or low-risk, while 4.28% were classified as Harmful Users, 8.26% as Hazardous Users, and 11.01% as Alcohol Dependent. Men were significantly more likely to be classified with an alcohol-use disorder than women (Table 4; OR = 7.234;  $p < 0.001$ ).

According to the responses on individual questions of the AUDIT, daily drinking patterns and quantity of alcohol consumed, the impact of alcohol on social interactions and daily responsibilities, and the prevalence of physical harm from alcohol varied by sex and age-group (Table 5). Men had a higher prevalence of high-risk drinking habits, with 22.96% of men reportedly consuming more than six drinks on a typical drinking day compared to just 3.6% of

**Table 4. Odds Ratio (OR), 90% Confidence Intervals (CI), and P-values (P) for bivariate and multivariate impact of sex and age on alcohol-use disorders.**

| Characteristic | Bivariate Analysis |              |        | Multivariate Analysis |              |        |
|----------------|--------------------|--------------|--------|-----------------------|--------------|--------|
|                | OR                 | 90% CI       | P      | OR                    | 90% CI       | P      |
| <b>Sex</b>     |                    |              |        |                       |              |        |
| Female         | Ref                |              |        | Ref                   |              |        |
| Male           | 7.234              | 4.299–12.175 | < .001 | 7.396                 | 4.379–12.492 | < .001 |
| <b>Age</b>     |                    |              |        |                       |              |        |
| 18–30          | Ref                |              |        | Ref                   |              |        |
| 31–59          | 1.58               | 1.001–2.505  | 0.099  | 1.695                 | 1.034–2.779  | 0.079  |
| 60+            | 1.723              | 0.875–3.396  | 0.187  | 1.882                 | 0.899–3.941  | 0.159  |

<https://doi.org/10.1371/journal.pone.0244249.t004>

Table 5. Responses by demographic segment for the Alcohol Use Disorder Identification Test (AUDIT).

| Question                                                                                                               | Answer                 | Demographic Segment |        |        |                             |        |        |                    |        |        |                  |        |        |
|------------------------------------------------------------------------------------------------------------------------|------------------------|---------------------|--------|--------|-----------------------------|--------|--------|--------------------|--------|--------|------------------|--------|--------|
|                                                                                                                        |                        | Total               | Women  | Men    | All Population in Age Group |        |        | Women in Age Group |        |        | Men in Age Group |        |        |
|                                                                                                                        |                        |                     |        |        | 18–30                       | 31–59  | 60+    | 18–30              | 31–59  | 60+    | 18–30            | 31–59  | 60+    |
| <b>1. How often do you have a drink containing alcohol?</b>                                                            | Never                  | 66.78%              | 83.75% | 49.43% | 69.34%                      | 65.69% | 61.67% | 88.16%             | 82.35% | 73.08% | 50.00%           | 48.75% | 50.00% |
|                                                                                                                        | Monthly or Less        | 7.58%               | 6.50%  | 8.67%  | 11.40%                      | 4.83%  | 4.42%  | 7.89%              | 5.88%  | 3.85%  | 15.00%           | 3.75%  | 5.00%  |
|                                                                                                                        | 2–4 times a month      | 8.80%               | 5.57%  | 11.15% | 5.60%                       | 9.14%  | 15.19% | 1.32%              | 7.06%  | 15.38% | 10.00%           | 11.25% | 15.00% |
|                                                                                                                        | 2–3 times a week       | 8.33%               | 2.08%  | 15.09% | 6.83%                       | 9.86%  | 9.36%  | 1.32%              | 2.35%  | 3.85%  | 12.50%           | 17.50% | 15.00% |
|                                                                                                                        | 4 or more times a week | 8.51%               | 2.08%  | 15.66% | 6.83%                       | 10.48% | 9.36%  | 1.32%              | 2.35%  | 3.85%  | 12.50%           | 18.75% | 15.00% |
| <b>2. How many drinks containing alcohol do you have on a typical day when you are drinking?</b>                       | 0                      | 66.78%              | 83.75% | 49.43% | 69.34%                      | 65.69% | 61.67% | 88.16%             | 82.35% | 73.08% | 50.00%           | 48.75% | 50.00% |
|                                                                                                                        | 1 or 2                 | 3.83%               | 3.81%  | 3.85%  | 3.80%                       | 4.21%  | 2.47%  | 2.63%              | 5.88%  | 0.00%  | 5.00%            | 2.50%  | 5.00%  |
|                                                                                                                        | 3 or 4                 | 6.35%               | 3.99%  | 8.77%  | 7.50%                       | 3.05%  | 15.19% | 2.63%              | 2.35%  | 15.38% | 12.50%           | 3.75%  | 15.00% |
|                                                                                                                        | 5 or 6                 | 9.86%               | 4.84%  | 14.99% | 10.07%                      | 11.05% | 4.42%  | 5.26%              | 4.71%  | 3.85%  | 15.00%           | 17.50% | 5.00%  |
|                                                                                                                        | 7, 8, or 9             | 3.48%               | 1.43%  | 5.58%  | 2.47%                       | 3.07%  | 8.83%  | 0.00%              | 1.18%  | 7.69%  | 5.00%            | 5.00%  | 10.00% |
|                                                                                                                        | 10 or more             | 9.70%               | 2.17%  | 17.38% | 6.83%                       | 12.94% | 7.41%  | 1.32%              | 3.53%  | 0.00%  | 12.50%           | 22.50% | 15.00% |
| <b>3. How often do you have six or more drinks on one occasion?</b>                                                    | Never                  | 75.12%              | 91.13% | 58.77% | 78.84%                      | 72.35% | 72.45% | 94.74%             | 89.41% | 84.62% | 62.50%           | 55.00% | 60.00% |
|                                                                                                                        | Less than monthly      | 1.38%               | 0.56%  | 2.22%  | 1.90%                       | 0.62%  | 2.47%  | 1.32%              | 0.00%  | 0.00%  | 2.50%            | 1.25%  | 5.00%  |
|                                                                                                                        | Monthly                | 4.80%               | 3.09%  | 6.54%  | 6.27%                       | 3.67%  | 3.89%  | 2.63%              | 2.35%  | 7.69%  | 10.00%           | 5.00%  | 0.00%  |
|                                                                                                                        | Weekly                 | 10.16%              | 4.77%  | 15.67% | 6.83%                       | 12.83% | 11.83% | 1.32%              | 8.24%  | 3.85%  | 15.50%           | 17.50% | 20.00% |
|                                                                                                                        | Daily or almost daily  | 8.54%               | 0.45%  | 16.81% | 6.17%                       | 10.54% | 9.36%  | 0.00%              | 0.00%  | 3.85%  | 15.50%           | 21.25% | 15.00% |
| <b>4. How often during the last year have you found that you were not able to stop drinking once you had started?</b>  | Never                  | 86.25%              | 95.74% | 76.55% | 88.80%                      | 84.02% | 85.70% | 97.37%             | 94.12% | 96.15% | 80.00%           | 73.75% | 75.00% |
|                                                                                                                        | Less than monthly      | 6.29%               | 2.11%  | 10.57% | 6.27%                       | 6.17%  | 6.89%  | 2.63%              | 1.18%  | 3.85%  | 10.00%           | 11.25% | 10.00% |
|                                                                                                                        | Monthly                | 0.57%               | 0.00%  | 1.15%  | 0.00%                       | 0.62%  | 2.47%  | 0.00%              | 0.00%  | 0.00%  | 0.00%            | 1.25%  | 5.00%  |
|                                                                                                                        | Weekly                 | 1.90%               | 2.15%  | 1.64%  | 1.23%                       | 2.99%  | 0.00%  | 0.00%              | 4.71%  | 0.00%  | 2.50%            | 1.25%  | 0.00%  |
|                                                                                                                        | Daily or almost daily  | 4.99%               | 0.00%  | 10.09% | 3.70%                       | 6.20%  | 4.94%  | 0.00%              | 0.00%  | 0.00%  | 7.50%            | 12.50% | 10.00% |
| <b>5. How often during the last year have you failed to do what was normally expected from you because of drinking</b> | Never                  | 80.94%              | 92.11% | 69.52% | 81.30%                      | 80.38% | 81.81% | 94.74%             | 90.59% | 88.46% | 67.50%           | 70.00% | 75.00% |
|                                                                                                                        | Less than monthly      | 11.38%              | 5.29%  | 17.60% | 13.77%                      | 9.81%  | 8.83%  | 5.26%              | 4.71%  | 7.69%  | 22.50%           | 15.00% | 10.00% |
|                                                                                                                        | Monthly                | 0.57%               | 0.00%  | 1.15%  | 0.00%                       | 1.24%  | 0.00%  | 0.00%              | 0.00%  | 0.00%  | 0.00%            | 2.50%  | 0.00%  |
|                                                                                                                        | Weekly                 | 3.29%               | 1.61%  | 5.00%  | 2.47%                       | 4.26%  | 2.47%  | 0.00%              | 3.53%  | 0.00%  | 5.00%            | 5.00%  | 5.00%  |

(Continued)

Table 5. (Continued)

| Question                                                                                                                                    | Answer                        | Demographic Segment |        |        |                             |        |        |                    |        |         |                  |        |        |
|---------------------------------------------------------------------------------------------------------------------------------------------|-------------------------------|---------------------|--------|--------|-----------------------------|--------|--------|--------------------|--------|---------|------------------|--------|--------|
|                                                                                                                                             |                               | Total               | Women  | Men    | All Population in Age Group |        |        | Women in Age Group |        |         | Men in Age Group |        |        |
|                                                                                                                                             |                               |                     |        |        | 18–30                       | 31–59  | 60+    | 18–30              | 31–59  | 60+     | 18–30            | 31–59  | 60+    |
|                                                                                                                                             | Daily or almost daily         | 3.83%               | 0.98%  | 6.73%  | 2.47%                       | 4.31%  | 6.89%  | 0.00%              | 1.18%  | 3.85%   | 5.00%            | 7.50%  | 10.00% |
| <b>6. How often during the last year have you needed a first drink in the morning to get yourself going after a heavy drinking session?</b> |                               |                     |        |        |                             |        |        |                    |        |         |                  |        |        |
|                                                                                                                                             | Never                         | 91.74%              | 96.73% | 86.64% | 92.50%                      | 90.19% | 95.06% | 97.37%             | 95.29% | 100.00% | 87.50%           | 85.00% | 90.00% |
|                                                                                                                                             | Less than monthly             | 3.55%               | 1.10%  | 6.06%  | 4.37%                       | 3.69%  | 0.00%  | 1.32%              | 1.18%  | 0.00%   | 7.50%            | 6.25%  | 0.00%  |
|                                                                                                                                             | Monthly                       | 0.00%               | 0.00%  | 0.00%  | 0.00%                       | 0.00%  | 0.00%  | 0.00%              | 0.00%  | 0.00%   | 0.00%            | 0.00%  | 0.00%  |
|                                                                                                                                             | Weekly                        | 1.68%               | 1.64%  | 1.72%  | 0.67%                       | 3.05%  | 0.00%  | 1.32%              | 2.35%  | 0.00%   | 0.00%            | 3.75%  | 0.00%  |
|                                                                                                                                             | Daily or almost daily         | 3.03%               | 0.54%  | 5.58%  | 2.47%                       | 3.07%  | 4.94%  | 0.00%              | 1.18%  | 0.00%   | 5.00%            | 5.00%  | 10.00% |
| <b>7. How often during the last year have you had a feeling of guilt or remorse after drinking?</b>                                         |                               |                     |        |        |                             |        |        |                    |        |         |                  |        |        |
|                                                                                                                                             | Never                         | 83.49%              | 95.27% | 71.46% | 86.90%                      | 81.51% | 78.81% | 96.05%             | 95.29% | 92.31%  | 77.50%           | 67.50% | 65.00% |
|                                                                                                                                             | Less than monthly             | 8.26%               | 3.74%  | 12.88% | 6.93%                       | 8.60%  | 11.83% | 3.95%              | 3.53%  | 3.85%   | 10.00%           | 13.75% | 20.00% |
|                                                                                                                                             | Monthly                       | 2.46%               | 45.00% | 4.51%  | 1.23%                       | 3.10%  | 4.42%  | 0.00%              | 0.00%  | 3.85%   | 2.50%            | 6.25%  | 5.00%  |
|                                                                                                                                             | Weekly                        | 3.60%               | 0.54%  | 6.72%  | 2.47%                       | 4.93%  | 2.47%  | 0.00%              | 1.18%  | 0.00%   | 5.00%            | 8.75%  | 5.00%  |
|                                                                                                                                             | Daily or almost daily         | 2.19%               | 0.00%  | 4.43%  | 2.47%                       | 1.86%  | 2.47%  | 0.00%              | 0.00%  | 0.00%   | 5.00%            | 3.75%  | 5.00%  |
| <b>8. How often during the last year have you been unable to remember what happened the night before because you had been drinking?</b>     |                               |                     |        |        |                             |        |        |                    |        |         |                  |        |        |
|                                                                                                                                             | Never                         | 84.74%              | 92.76% | 76.54% | 88.13%                      | 83.45% | 77.39% | 96.05%             | 91.76% | 84.62%  | 80.00%           | 75.00% | 70.00% |
|                                                                                                                                             | Less than monthly             | 6.22%               | 3.16%  | 9.35%  | 6.83%                       | 4.85%  | 9.36%  | 1.32%              | 4.71%  | 3.85%   | 12.50%           | 5.00%  | 15.00% |
|                                                                                                                                             | Monthly                       | 3.01%               | 2.02%  | 4.02%  | 1.33%                       | 3.72%  | 6.36%  | 2.63%              | 0.00%  | 7.69%   | 0.00%            | 7.50%  | 5.00%  |
|                                                                                                                                             | Weekly                        | 4.08%               | 2.06%  | 6.15%  | 2.47%                       | 4.88%  | 6.89%  | 0.00%              | 3.53%  | 3.85%   | 5.00%            | 6.25%  | 10.00% |
|                                                                                                                                             | Daily or almost daily         | 1.94%               | 0.00%  | 3.93%  | 1.23%                       | 3.10%  | 0.00%  | 0.00%              | 0.00%  | 0.00%   | 2.50%            | 6.25%  | 0.00%  |
| <b>9. Have you or someone else been injured as a result of your drinking?</b>                                                               |                               |                     |        |        |                             |        |        |                    |        |         |                  |        |        |
|                                                                                                                                             | No                            | 78.98%              | 91.53% | 66.15% | 78.74%                      | 79.73% | 76.87% | 92.11%             | 91.76% | 88.46%  | 65.00%           | 67.50% | 65.00% |
|                                                                                                                                             | Yes, but not in the last year | 8.88%               | 5.71%  | 12.11% | 9.40%                       | 9.16%  | 5.84%  | 3.95%              | 5.88%  | 11.54%  | 15.00%           | 12.50% | 0.00%  |
|                                                                                                                                             | Yes, during the last year     | 12.15%              | 2.76%  | 21.74% | 11.87%                      | 11.10% | 17.30% | 3.95%              | 2.35%  | 0.00%   | 20.00%           | 20.00% | 35.00% |
| <b>10. Has a relative or friend or doctor or another health worker been concerned about your drinking or suggested you cut down?</b>        |                               |                     |        |        |                             |        |        |                    |        |         |                  |        |        |
|                                                                                                                                             | No                            | 70.63%              | 88.90% | 51.95% | 75.60%                      | 66.80% | 67.51% | 90.79%             | 88.24% | 84.62%  | 60.00%           | 45.00% | 50.00% |
|                                                                                                                                             | Yes, but not in the last year | 8.20%               | 4.28%  | 12.21% | 8.17%                       | 8.57%  | 6.89%  | 3.95%              | 4.71%  | 3.85%   | 12.50%           | 12.50% | 10.00% |

(Continued)



Table 5. (Continued)

| Question | Answer                    | Demographic Segment |       |        |                             |        |        |                    |       |        |                  |        |        |
|----------|---------------------------|---------------------|-------|--------|-----------------------------|--------|--------|--------------------|-------|--------|------------------|--------|--------|
|          |                           | Total               | Women | Men    | All Population in Age Group |        |        | Women in Age Group |       |        | Men in Age Group |        |        |
|          |                           |                     |       |        | 18–30                       | 31–59  | 60+    | 18–30              | 31–59 | 60+    | 18–30            | 31–59  | 60+    |
|          | Yes, during the last year | 21.17%              | 6.81% | 35.84% | 16.23%                      | 24.63% | 25.60% | 5.26%              | 7.06% | 11.54% | 27.50%           | 42.50% | 40.00% |

<https://doi.org/10.1371/journal.pone.0244249.t005>

women. Men also had a higher prevalence of the consumption of six or more drinks daily with 16.81%, compared to 0.45% of women, and 39.02% of men report heavy episodic drinking (defined as consuming six or more drinks at least once a month), compared to 8.31% of women.

#### 4. Discussion

In this study, Photovoice was used to engage community members in Kuc, Uganda in bottom-up research agenda setting. The results detailed in this paper, including the triangulation of community identified need and disease burden, have implications for the design of research and interventions, highlighting the importance of locally derived priorities and data when designing and implementing community-level interventions and programs. By giving participants cameras to document their perceptions of health using Photovoice, Kuc community members selected alcohol-use disorders as the topic for future public health research and intervention. A survey was then conducted, the results of the which indicated 23.55% of Kuc adults had an alcohol-use disorder, 16.45 percentage points higher than WHO estimates for Uganda [73], thus verifying the results of Photovoice through triangulation. The importance of the results of this study are thus two-fold: the *process* of collecting data to identify community-based priorities for research and *results* of that research process.

The research process and approach taken in this endeavor underscores the importance of community-based approaches and demonstrates one (of, no doubt, many) bottom-up approach. Importantly, the research illustrates the effectiveness of using Photovoice as a method to elicit community priorities for research and practice, particularly when used in tandem with other methods that allow for triangulation and validation/invalidation of those findings. This process led to identification of alcohol-use disorders as a priority intervention. That alcohol-use disorders, which are a Non-Communicable Disease (NCD), were identified by the community as their highest priority highlights the importance of community engagement in research priority setting, as researchers and practitioners navigate the simultaneous burden of NCDs and infectious disease in LMICs. While NCDs accounted for 73% of mortality and 62% of all global Disability-Adjusted Life Years (DALYs) in 2017 and are continuing to increase rapidly, Development Assistance for Health only allocated 1.78% of the total global budget to all NCDs [74,75]. This divide between funding, disease burden, and, by extension, action, in public health research in LMICs could inhibit sensitivity to local priorities. Working with communities to identify priorities may help overcome this divide.

The results from photovoice and the follow up survey point to alcohol-use disorders as a major health concern for the people of Kuc. Prior studies indicate that Uganda has one of the highest alcohol consumption rates in the world [76–78]. Previous studies using the AUDIT in northern Uganda found a prevalence of alcohol use disorders among 16.2% of adult IDPs in Gulu and Amuru districts in 2006 [79], 21.5% in rural communities in northern Uganda in 2010 [71], and 4.3% among communities in Gulu, Amuru, and Nwoya districts in 2012 [80]. Results presented here show higher levels and more severe patterns of alcohol-use disorders

(including alcohol dependence) than all three prior analyses. Participants expressed the negative impacts of alcohol on households, families, and the community-at-large. While there remains limited literature on the impacts of alcohol-use disorders in Uganda [70,81,82], available research has shown the increased vulnerability of excess alcohol-consumption for individuals of lower socioeconomic and educational backgrounds due to a reduction in social and environmental buffers from harm, and a higher proportion of income directed towards the consumption of alcohol [77,83]. Considering alcohol is known to be fully or partially responsible for approximately 230 diseases and injuries globally [84], the burden of alcohol on health and the efficacy of community-based and approved solutions for alcohol-use disorders in Kuc merit investigation and attention.

It is important to note that, in addition to alcohol-use disorders, Photovoice participants identified two other major health issues in Kuc: water quality and sanitation and poor infrastructure. Water quality and sanitation emerge as prominent themes in other Photovoice studies of health in East Africa [57,58,85,86]. In rural Uganda, only 66% of villages have access to a source of safe water and 36.5% of households have hand washing facilities with both soap and water [87], and enteric infections account for 5.52% of deaths and 5.16% of DALYs in Uganda [74]. Community solutions proposed by Photovoice participants, such as employing a caretaker to ensure proper-use and maintenance of drinking water access points, matches best-practices outlined by the World Bank, whereby strong local management is correlated with proper maintenance and protection of water resources [88]. Poor infrastructure, cited as a barrier to education and economic opportunity in Kuc, is a well-documented constraint to health. Road injuries accounting for 2.51% of all deaths and 2.00% of DALYs in Uganda [74]. While an improved road network can directly influence health by connecting communities to important health services [89,90], it is also an important economic driver for rural communities, increasing economic welfare, addressing some of the social-determinants of health [91,92] and many of the SDGs [93–96]. Although road networks in Uganda have improved drastically over the past decade [97], Ugandan residents remain overwhelmingly frustrated and unsatisfied with the quality of roads and infrastructure throughout the country [98].

The bottom-up agenda setting process documented in this paper highlights the ethical and practical benefits of partnering with target communities in public health programming. These results highlight the tension between what Pratt [7] calls ‘macro level’ decisions and priority setting from external research funders and donors, and priorities of target communities. The Kuc community selected the underfunded and understudied health issue of alcohol-use disorders [99] to guide future study and public health action in the community. By augmenting current donor-driven agenda setting with a bottom-up agenda setting approach like the one outlined in this paper, the divide between local realities and global priorities could be further bridged.

### Study strengths and limitations

Compared to past Photovoice studies conducted in this region, this analysis triangulates findings using quantitative data to verify results and strengthen Photovoice conclusions. This paper found stark differences in alcohol-use disorders compared to prior prevalence studies within northern Uganda [71,79,80]. The higher level of alcohol-use disorders in this paper are likely due to time since data collection, the different communities and population types included in the study, and problems limiting the comparability of studies using the AUDIT [100], namely the cutoff point used to evaluate probable alcohol-use disorders and the definition of a standard unit of alcohol. Although the authors were able to standardize the cutoff points for comparison between these three studies, most of the three prior studies used unclear

or imprecise alcohol unit definitions. For instance, Blair et al. [80] considered a sachet of Waragi (100 mL at 40% ABV) and a single beer (generally 500 mL at 5% ABV) to be one unit of alcohol, while not specifying the local alcohol ABV percentages used in their calculation. Using the formula outlined in this paper's methods section, a sachet of Waragi would equate to 3 units, while a 500 mL beer would equate to 2 units, likely resulting in a significant under-reporting of alcohol-use disorders in the Blair et al. [80] paper. Similarly, Roberts et al. [79] used the typologies of "1 glass of waragi, one bottle or glass of local brew or one bottle of beer" which also was likely an underestimation. Ertl et al. [71] used the definition of one unit equal to 13g of pure ethanol and identified ABV of recorded alcohol, but appear to have excluded calculations of unrecorded alcohol, which is most prevalent in rural communities. Thus, this study represents the first in the region to clearly state ABV for common alcoholic drinks consumed in this region, including unrecorded alcohol.

The results must be viewed against potential limitations of this study. While the overall goal was to utilize Photovoice to gain rich data from few participants, caution must be used when extrapolating the results of this study outside of the village of Kuc to other areas of Uganda or East Africa. Rather, this study helps to illuminate community perspectives and priorities within the realm of health and highlights how Kuc community members view health in line with a social-ecological lens [101,102]. Sampling for AUDIT was completed using a random-clustered approach based on all individuals in a household that are 18 and older. If specific demographics were absent from the household due to working or travelling away from home, the representativeness of the sample could be impacted. Sampling weights were used as an attempt to correct for over and under sampling. Additionally, it has been suggested that AUDIT cutoff points be reduced in LMICs due to the regressive impacts of alcohol in poorer households [66,80,100]. In this analysis, the researchers refrained from lowering the AUDIT cutoff, as there has not been a verified psychometric analysis of the AUDIT instrument in this study location. Lowering the AUDIT cutoff would increase the sensitivity of the instrument. Thus, these numbers could be a conservative estimate of alcohol-use disorders in Kuc. The researchers suggest a psychometric analysis of the AUDIT be completed in northern Uganda, specifically, and Uganda, in general, to aid researchers in better understanding the likely burden of alcohol-use disorders within this region. Finally, recall bias should be considered as a limitation when interpreting the results of the AUDIT due to the survey assessing average participant alcohol consumption patterns over the twelve-month period leading up to the survey date.

## 5. Conclusions

This study used Photovoice as a research tool to identify and include a community in research-agenda setting and to better understand community perceptions regarding community health issues and strengths in Kuc, Uganda. The results identified alcohol as the main issue of community concern. A quantitative, cross-sectional survey using AUDIT was conducted to triangulate high levels of alcohol-use disorders within the Kuc community. The community identified issue of alcohol-use disorders will be the topic in the long-term CBPR inspired project. The project goal is the development, implementation, and evaluation of a community-driven public health program that builds on community strengths to address alcohol-use disorders in Kuc. At the time of publication of this article, focus groups have been conducted with community members and VHTs on community opinions and perceptions of potential alcohol-use disorder, evidence-based public health programs to implement in Kuc that build off community strengths. As suggested by the results of this study, if public health is to maintain sensitivity to local realities, including local perspectives in research and practice,

bottom-up agenda setting is a must to ensure health issues of community importance are addressed.

## Supporting information

**S1 Data. Deidentified AUDIT dataset.**  
(CSV)

## Acknowledgments

We thank Dr. Greg Glass, Dr. Amy Blue, Dr. Innocent Rwego, and Dr. Brian Child for their support and guidance in the development of this research. We also thank Conrad Mandsager, Winnifred Opwonya, Oyet Vincent, and Kristin Barlow for their help in facilitating government approvals, permissions, and community introductions. Finally, we thank Andy Gotelli, James Richardson, and Katherine Fiorillo for their vital support of this research project and manuscript.

## Author Contributions

**Conceptualization:** Nicholas Dowhaniuk, Susan Ojok, Sarah L. McKune.

**Data curation:** Nicholas Dowhaniuk.

**Formal analysis:** Nicholas Dowhaniuk, Susan Ojok.

**Funding acquisition:** Nicholas Dowhaniuk.

**Investigation:** Nicholas Dowhaniuk, Susan Ojok.

**Methodology:** Nicholas Dowhaniuk, Sarah L. McKune.

**Project administration:** Nicholas Dowhaniuk, Susan Ojok, Sarah L. McKune.

**Supervision:** Sarah L. McKune.

**Writing – original draft:** Nicholas Dowhaniuk.

**Writing – review & editing:** Nicholas Dowhaniuk, Susan Ojok, Sarah L. McKune.

## References

1. United Nations. Sustainable Development Goals. In: United Nations [Internet]. 2015. Available: <https://sustainabledevelopment.un.org/?menu=1300>.
2. Rosa WE, Kurth AE, Sullivan-Marx E, Shamian J, Shaw HK, Wilson LL, et al. Nursing and midwifery advocacy to lead the United Nations Sustainable Development Agenda. *Nurs Outlook*. 2019; 67: 628–641. <https://doi.org/10.1016/j.outlook.2019.06.013> PMID: 31420180
3. Squires A. US nursing and midwifery research capacity building opportunities to achieve the United Nations sustainable development goals. *Nurs Outlook*. 2019; 67: 642–648. <https://doi.org/10.1016/j.outlook.2019.06.016> PMID: 31376985
4. Upvall MJ, Luzincourt G. Global citizens, healthy communities: Integrating the sustainable development goals into the nursing curriculum. *Nurs Outlook*. 2019; 67: 649–657. <https://doi.org/10.1016/j.outlook.2019.04.004> PMID: 31439322
5. Miyamoto S, Cook E. The procurement of the UN sustainable development goals and the American national policy agenda of nurses. *Nurs Outlook*. 2019; 67: 658–663. <https://doi.org/10.1016/j.outlook.2019.09.004> PMID: 31653341
6. United Nations General Assembly. Resolution Adopted by General Assesmbly on 6 July 2017. Geneva, Switzerland: United Nations; 2017. Report No.: A/RES/71/313. Available: <https://undocs.org/pdf?symbol=en/A/RES/71/313>.

7. Pratt B, Sheehan M, Barsdorf N, Hyder AA. Exploring the ethics of global health research priority-setting. *BMC Med Ethics*. 2018; 19: 94. <https://doi.org/10.1186/s12910-018-0333-y> PMID: 30522485
8. Pratt B. Developing a toolkit for engagement practice: sharing power with communities in priority-setting for global health research projects. *BMC Med Ethics*. 2020; 21: 21. <https://doi.org/10.1186/s12910-020-0462-y> PMID: 32171302
9. Pratt B, Vries J de. Community engagement in global health research that advances health equity. *Bioethics*. 2018; 32: 454–463. <https://doi.org/10.1111/bioe.12465> PMID: 30035349
10. Pratt B. Towards inclusive priority-setting for global health research projects: recommendations for sharing power with communities. *Health Policy Plan*. 2019; 34: 346–357. <https://doi.org/10.1093/heapol/czz041> PMID: 31168568
11. Nelson E. A resource guide for community engagement and involvement in global health research. National Institute for Health Research and Institute for Development Studies; 2019.
12. Reddy KS, Mathur MR, Negi S, Krishna B. Redefining public health leadership in the sustainable development goal era. *Health Policy Plan*. 2017; 32: 757–759. <https://doi.org/10.1093/heapol/czx006> PMID: 28369486
13. Beaglehole R, Epping-Jordan J, Patel V, Chopra M, Ebrahim S, Kidd M, et al. Improving the prevention and management of chronic disease in low-income and middle-income countries: a priority for primary health care. *The Lancet*. 2008; 372: 940–949. [https://doi.org/10.1016/S0140-6736\(08\)61404-X](https://doi.org/10.1016/S0140-6736(08)61404-X) PMID: 18790317
14. Samb B, Desai N, Nishtar S, Mendis S, Bekedam H, Wright A, et al. Prevention and management of chronic disease: a litmus test for health-systems strengthening in low-income and middle-income countries. *The Lancet*. 2010; 376: 1785–1797. [https://doi.org/10.1016/S0140-6736\(10\)61353-0](https://doi.org/10.1016/S0140-6736(10)61353-0) PMID: 21074253
15. Arifeen SE, Christou A, Reichenbach L, Osman FA, Azad K, Islam KS, et al. Community-based approaches and partnerships: innovations in health-service delivery in Bangladesh. *The Lancet*. 2013; 382: 2012–2026. [https://doi.org/10.1016/S0140-6736\(13\)62149-2](https://doi.org/10.1016/S0140-6736(13)62149-2) PMID: 24268607
16. McCord GC, Liu A, Singh P. Deployment of community health workers across rural sub-Saharan Africa: financial considerations and operational assumptions. *Bull World Health Organ*. 2013; 91: 244–253B. <https://doi.org/10.2471/BLT.12.109660> PMID: 23599547
17. World Health Organization. Innovative Care for Chronic Conditions: Building Blocks for Action: Global Report. World Health Organization; 2002. Available: <http://www.annsaudimed.net/index.php/vol24/vol24iss2/3883.html>.
18. Adams V, Burke NJ, Whitmarsh I. Slow Research: Thoughts for a Movement in Global Health. *Med Anthropol*. 2014; 33: 179–197. <https://doi.org/10.1080/01459740.2013.858335> PMID: 24761973
19. Addo-Atuah J, Senhaji-Tomza B, Ray D, Basu P, Loh F-H (Ellen), Owusu-Daaku F. Global health research partnerships in the context of the Sustainable Development Goals (SDGs). *Res Soc Adm Pharm*. 2020 [cited 16 Oct 2020]. <https://doi.org/10.1016/j.sapharm.2020.08.015> PMID: 32893133
20. Wallerstein N, Duran B. Community-based participatory research contributions to intervention research: the intersection of science and practice to improve health equity. *Am J Public Health*. 2010; 100: S40-6 1p. <https://doi.org/10.2105/AJPH.2009.184036> PMID: 20147663
21. Shiu-Thornton S. Addressing cultural competency in research: Integrating a community-based participatory research approach. *Alcoholism: Clinical and Experimental Research*. Blackwell Publishing Ltd; 2003. pp. 1361–1364. <https://doi.org/10.1097/01.ALC.0000080200.07061.66> PMID: 12966340
22. Manda-Taylor L. Establishing community advisory boards for clinical trial research in Malawi: engendering ethical conduct in research. *Malawi Med J*. 2013; 25: 96–100. PMID: 24926395
23. Quinn SC. Ethics in Public Health Research. *Am J Public Health*. 2004; 94: 918–922. <https://doi.org/10.2105/ajph.94.6.918> PMID: 15249289
24. Maher D, Sekajugo J, Harries AD, Grosskurth H. Research needs for an improved primary care response to chronic non-communicable diseases in Africa. *Trop Med Int Health*. 2010; 15: 176–181. <https://doi.org/10.1111/j.1365-3156.2009.02438.x> PMID: 20002618
25. Ager A, Zarowsky C. Balancing the personal, local, institutional, and global: Multiple case study and multidimensional scaling analysis of African experiences in addressing complexity and political economy in health research capacity strengthening. *Health Res Policy Syst*. 2015; 13: 5. <https://doi.org/10.1186/1478-4505-13-5> PMID: 25595847
26. World Health Organization, Council for International Organizations of Medical Sciences. International ethical guidelines for health-related research involving humans. Geneva: CIOMS; 2017.
27. Israel BA. Methods for community-based participatory research for health. Jossey-Bass; 2013.

28. Israel BA, Schulz AJ, Parker EA, Becker AB. Review of Community-Based Participatory Research: Assessing Partnership Approaches to Improve Public Health. *Annu Rev Public Health*. 1998; 19: 173–202. <https://doi.org/10.1146/annurev.publhealth.19.1.173> PMID: 9611617
29. Minkler M, Wallerstein N. Introduction to Community-Based Participatory Research: New Issues and Emphases. *Participatory Research for Health: From Process to Outcomes*. 2008. pp. 5–23.
30. Delafield R, Hermosura A (Nacapoy), Ing CT, Hughes CK, Palakiko D-M, Dillard A, et al. A Community-Based Participatory Research Guided Model for the Dissemination of Evidence-Based Interventions. *Prog Community Health Partnersh Res Educ Action*. 2016; 10: 585–595. <https://doi.org/10.1353/cpr.2016.0067> PMID: 28569684
31. Napier AD, Ancarno C, Butler B, Calabrese J, Chater A, Chatterjee H, et al. Culture and health. *The Lancet*. 2014; 384: 1607–1639. [https://doi.org/10.1016/S0140-6736\(14\)61603-2](https://doi.org/10.1016/S0140-6736(14)61603-2)
32. Minkler M. Linking science and policy through community-based participatory research to study and address health disparities. *Am J Public Health*. 2010; 100: S81–7. <https://doi.org/10.2105/AJPH.2009.165720> PMID: 20147694
33. Leung MW, Yen IH, Minkler M. Community based participatory research: a promising approach for increasing epidemiology's relevance in the 21st century. *Int J Epidemiol*. 2004; 33: 499–506. <https://doi.org/10.1093/ije/dyh010> PMID: 15155709
34. Cacari-Stone L, Wallerstein N, Garcia AP, Minkler M. The promise of community-based participatory research for health equity: A conceptual model for bridging evidence with policy. *Am J Public Health*. 2014; 104: 1615–1623. <https://doi.org/10.2105/AJPH.2014.301961> PMID: 25033119
35. Cashman SB, Adeky S, Allen AJ, Corburn J, Israel BA, Montaño J, et al. The power and the promise: working with communities to analyze data, interpret findings, and get to outcomes. *Am J Public Health*. 2008; 98: 1407–17. <https://doi.org/10.2105/AJPH.2007.113571> PMID: 18556617
36. Kingery FP, Naanyu V, Allen W, Patel P. Photovoice in Kenya: Using a Community-Based Participatory Research Method to Identify Health Needs. *Qual Health Res*. 2016; 26: 92–104. <https://doi.org/10.1177/1049732315617738> PMID: 26679942
37. Wang C, Burris MA. Photovoice: Concept, Methodology, and Use for Participatory Needs Assessment. *Health Educ Behav*. 1997; 24: 369–387. <https://doi.org/10.1177/109019819702400309> PMID: 9158980
38. Sander A. From the Nature & Growth of Photography: Lecture 5: Photography as a universal language. *Mass Rev*. 1978; 19: 674–679.
39. Newman IM, Kanjanawong S. Using Photography to Cross Generational, Linguistic, and Cultural Barriers to Develop Useful Survey Instruments. *Health Promot Pract*. 2005; 6: 53–56. <https://doi.org/10.1177/1524839903259307> PMID: 15574528
40. Gallo ML. Immigrant workers' journeys through a new culture: Exploring the transformative learning possibilities of photography. *Stud Educ Adults*. 2001; 33: 109–117. <https://doi.org/10.1080/02660830.2001.11661446>
41. McIntyre A, Chatzopoulos N, Politi A, Roz J. Participatory action research: Collective reflections on gender, culture, and language. *Teach Teach Educ*. 2007; 23: 748–756. <https://doi.org/10.1016/j.tate.2006.12.025>
42. Wang CC, Pies CA. Family, Maternal, and Child Health Through Photovoice. *Matern Child Health J*. 2004; 8: 95–102. <https://doi.org/10.1023/b:maci.0000025732.32293.4f> PMID: 15198177
43. Wang C, Burris MA, Ping XY. Chinese village women as visual anthropologists: A participatory approach to reaching policymakers. *Soc Sci Med*. 1996; 42: 1391–1400. [https://doi.org/10.1016/0277-9536\(95\)00287-1](https://doi.org/10.1016/0277-9536(95)00287-1) PMID: 8735895
44. Padgett DK. *Choosing the Right Qualitative Approach(es)*. 3rd ed. Qualitative Methods in Social Work Research. 3rd ed. SAGE Publications, Inc.
45. MacDonald C. Understanding Participatory Action Research: A Qualitative Research Methodology Option. *Can J Action Res*. 2012; 13: 34–50.
46. Wallerstein N, Bernstein E. Empowerment Education: Freire's Ideas Adapted to Health Education. *Health Educ Behav*. 1988; 15: 379–394. <https://doi.org/10.1177/109019818801500402> PMID: 3230016
47. Watts RJ, Diemer MA, Voight AM. Critical consciousness: Current status and future directions. *New Dir Child Adolesc Dev*. 2011; 2011: 43–57. <https://doi.org/10.1002/cd.310> PMID: 22147600
48. Carlson ED, Engebretson J, Chamberlain RM. Photovoice as a Social Process of Critical Consciousness. *Qual Health Res*. 2006; 16: 836–852. <https://doi.org/10.1177/1049732306287525> PMID: 16760539
49. Freire P, Macedo D. *Pedagogy of the Oppressed*, 30th Anniversary Edition. 30th Anniversary edition. New York: Continuum; 2000.

50. Liebenberg L. Thinking Critically About Photovoice: Achieving Empowerment and Social Change. *Int J Qual Methods*. 2018; 17: 1609406918757631. <https://doi.org/10.1177/1609406918757631>
51. Nampindo S, Phillipps GP, Plumptre A. The impact of conflict in Northern Uganda on the Environment and natural resource management. Wildlife Conservation Society and USAID; 2005.
52. Namakula J, Witter S. Living through conflict and post-conflict: Experiences of health workers in northern Uganda and lessons for people-centred health systems. *Health Policy Plan*. 2014; 29: ii6–ii14. <https://doi.org/10.1093/heapol/czu022> PMID: 25274642
53. Ministry of Health. Annual Health Sector Performance Report FY 2016/17. Kampala, Uganda: Republic of Uganda Ministry of Health; 2017.
54. UBOS. National Population and Housing Census 2014. Kampala, Uganda: Uganda Bureau of Statistics; 2014.
55. Newman SD, Andrews JO, Magwood GS, Jenkins C, Cox MJ, Williamson DC. Community advisory boards in community-based participatory research: a synthesis of best processes. *Prev Chronic Dis*. 2011; 8: A70. PMID: 21477510
56. Cramer ME, Lazoritz S, Shaffer K, Palm D, Ford AL. Community Advisory Board Members' Perspectives Regarding Opportunities and Challenges of Research Collaboration. *West J Nurs Res*. 2018; 40: 1032–1048. <https://doi.org/10.1177/0193945917697229> PMID: 28367677
57. Bisung E, Elliott SJ, Abudho B, Schuster-Wallace CJ, Karanja DM. Dreaming of toilets: Using photovoice to explore knowledge, attitudes and practices around water–health linkages in rural Kenya. *Health Place*. 2015; 31: 208–215. <https://doi.org/10.1016/j.healthplace.2014.12.007> PMID: 25576836
58. Bisung E, Elliott SJ, Abudho B, Karanja DM, Schuster-Wallace CJ. Using Photovoice as a Community Based Participatory Research Tool for Changing Water, Sanitation, and Hygiene Behaviours in Usoma, Kenya. In: *BioMed Research International* [Internet]. 2015 [cited 30 Mar 2019]. <https://doi.org/10.1155/2015/903025> PMID: 26380305
59. Budig K, Diez J, Conde P, Sastre M, Hernán M, Franco M. Photovoice and empowerment: evaluating the transformative potential of a participatory action research project. *BMC Public Health*. 2018; 18: 432. <https://doi.org/10.1186/s12889-018-5335-7> PMID: 29609576
60. QSR International Pty Ltd. NVivo Qualitative Data Analysis Software. Version 12. 2018.
61. Gibbs G. *Analyzing Qualitative Data*. 1 Oliver's Yard, 55 City Road, London England EC1Y 1SP United Kingdom: SAGE Publications, Ltd; 2007. <https://doi.org/10.4135/9781849208574>
62. Saldana J. *The coding manual for qualitative researchers*. 3rd ed. London, England: SAGE Publications, Ltd; 2016.
63. Dey I. *Qualitative data analysis: A user-friendly guide for social scientists*. London, England: Routledge; 1993.
64. Kodish S, Gittelsohn J. Systematic data analysis in qualitative health research: Building credible and clear findings. *Sight Life*. 2011;25.
65. Strauss A, Corbin J. *Basics of Qualitative Research Techniques*. Thousand Oaks, CA: Sage Publications; 1998.
66. Babor TF, Higgins-Biddle JC, Saunders JB, Monteiro MG. *The Alcohol Use Disorders Identification Test: Guidelines for Use in Primary Care*. Geneva, Switzerland: World Health Organization; 2001 p. 41. Report No.: WHO/MSD/MSB/01.6a.
67. R Development Core Team R. *R: A Language and Environment for Statistical Computing*. 2011. Available: <http://www.r-project.org>.
68. Kubo R, Funakawa S, Araki S, Kitabatake N. Production of indigenous alcoholic beverages in a rural village of Cameroon. *J Inst Brew*. 2014; 120: 133–141. <https://doi.org/10.1002/jib.116>
69. Papas RK, Sidle JE, Wamalwa ES, Okumu TO, Bryant KL, Goulet JL, et al. Estimating Alcohol Content of Traditional Brew in Western Kenya Using Culturally Relevant Methods: The Case for Cost Over Volume. *AIDS Behav*. 2010; 14: 836–844. <https://doi.org/10.1007/s10461-008-9492-z> PMID: 19015972
70. Kabwama SN, Ndyabangi S, Mutungi G, Wesonga R, Bahendeka SK, Guwatudde D. Alcohol use among adults in Uganda: findings from the countrywide non-communicable diseases risk factor cross-sectional survey. *Glob Health Action*. 2016; 9: 31302. <https://doi.org/10.3402/gha.v9.31302> PMID: 27491961
71. Ertl V, Saile R, Neuner F, Catani C. Drinking to ease the burden: a cross-sectional study on trauma, alcohol abuse and psychopathology in a post-conflict context. *BMC Psychiatry*. 2016; 16: 202. <https://doi.org/10.1186/s12888-016-0905-7> PMID: 27342048

72. Lee E, Forthofer R. Analyzing Complex Survey Data. 2455 Teller Road, Thousand Oaks California 91320 United States of America: SAGE Publications, Inc.; 2006. <https://doi.org/10.4135/9781412983341>
73. World Health Organization. Uganda Alcohol Consumption: Levels and Patterns. World Health Organization; 2018. Available: [https://www.who.int/substance\\_abuse/publications/global\\_alcohol\\_report/profiles/uga.pdf?ua=1](https://www.who.int/substance_abuse/publications/global_alcohol_report/profiles/uga.pdf?ua=1).
74. IHME. Global Burden of Disease Results Tool. Seattle, WA: Institute for Health Metrics and Evaluation; 2019.
75. Institute for Health Metrics and Evaluation (IHME). Development Assistance for Health Database 1990–2019. Seattle, WA: Institute for Health Metrics and Evaluation (IHME); 2020.
76. WHO. Global status report on alcohol and health 2014. Geneva, Switzerland: World Health Organization; 2014.
77. Lwanga-Ntale. Drinking into deeper poverty: The new frontier for chronic poverty in Uganda. Kampala Uganda: Chronic Poverty Research Centre; 2007. Report No.: 1.
78. Griswold MG, Fullman N, Hawley C, Arian N, Zimsen SRM, Tymeson HD, et al. Alcohol use and burden for 195 countries and territories, 1990–2016: a systematic analysis for the Global Burden of Disease Study 2016. *The Lancet*. 2018; 392: 1015–1035. [https://doi.org/10.1016/S0140-6736\(18\)31310-2](https://doi.org/10.1016/S0140-6736(18)31310-2) PMID: 30146330
79. Roberts B, Felix Ocaka K, Browne J, Oyok T, Sondorp E. Alcohol disorder amongst forcibly displaced persons in northern Uganda. *Addict Behav*. 2011; 36: 870–873. <https://doi.org/10.1016/j.addbeh.2011.03.006> PMID: 21481540
80. Blair AH, Pearce ME, Katamba A, Malamba SS, Muyinda H, Schechter MT, et al. The Alcohol Use Disorders Identification Test (AUDIT): Exploring the Factor Structure and Cutoff Thresholds in a Representative Post-Conflict Population in Northern Uganda. *Alcohol Alcohol*. 2017; 52: 318–327. <https://doi.org/10.1093/alcalc/ags090> PMID: 28003244
81. Kafuko A, Bukuluki P. Qualitative Research in Uganda on Knowledge, Attitudes and Practices Concerning Alcohol. USAID; 2008. Available: <https://www.k4health.org/sites/default/files/Alcohol%20Study%20Report%20FINAL%20March%2013th.pdf>.
82. Tumwesigye NM, Kasirye R, Nansubuga E. Is social interaction associated with alcohol consumption in Uganda? *Drug Alcohol Depend*. 2009; 103: 9–15. <https://doi.org/10.1016/j.drugalcdep.2009.01.016> PMID: 19406589
83. Grittner U, Kuntsche S, Graham K, Bloomfield K. Social Inequalities and Gender Differences in the Experience of Alcohol-Related Problems. *Alcohol Alcohol Oxf Oxf*. 2012; 47: 597–605. <https://doi.org/10.1093/alcalc/ags040> PMID: 22542707
84. Rehm J, Gmel GE, Gmel G, Hasan OSM, Imtiaz S, Popova S, et al. The relationship between different dimensions of alcohol use and the burden of disease—an update. *Addict Abingdon Engl*. 2017; 112: 968–1001. <https://doi.org/10.1111/add.13757> PMID: 28220587
85. Musoke D, Ssemugabo C, Ndejjo R, Ekirapa-Kiracho E, George AS. Reflecting strategic and conforming gendered experiences of community health workers using photovoice in rural Wakiso district, Uganda. *Hum Resour Health*. 2018; 16: 41. <https://doi.org/10.1186/s12960-018-0306-8> PMID: 30134905
86. Musoke D, Ekirapa-Kiracho E, Ndejjo R, George A. Using photovoice to examine community level barriers affecting maternal health in rural Wakiso district, Uganda. *Reprod Health Matters*. 2015; 23: 136–147. <https://doi.org/10.1016/j.rhm.2015.06.011> PMID: 26278841
87. Water and Environment Sector Performance Report 2018. Kampala, Uganda: Government of Uganda Ministry of Water and Environment; 2018. Available: <https://www.mwe.go.ug/sites/default/files/library/SPR%202018%20%20FINAL.pdf>.
88. Sara J, Katz T. Making rural water supply sustainable: Report on the impact of project rules. Washington, D.C.: World Bank Water and Sanitation Program; 2005. Report No.: 33105. Available: <http://documents.worldbank.org/curated/en/495261468135922056/pdf/331050global1ruralreport.pdf>.
89. Bakeera SK, Wamala SP, Galea S, State A, Peterson S, Pariyo GW. Community perceptions and factors influencing utilization of health services in Uganda. *Int J Equity Health*. 2009; 8: 25. <https://doi.org/10.1186/1475-9276-8-25> PMID: 19602244
90. Naiga R, Penker M, Hogni K. Challenging pathways to safe water access in rural Uganda: From supply to demand-driven water governance. *Int J Commons*. 2015; 9: 237–260.
91. Marmot M. Social determinants of health inequalities. *The Lancet*. 2005; 365: 1099–1104. [https://doi.org/10.1016/S0140-6736\(05\)71146-6](https://doi.org/10.1016/S0140-6736(05)71146-6) PMID: 15781105
92. Wilkinson R, Marmot M. Social Determinants of Health: the Solid Facts. World Health Organ. 2003; 2: 1–33. <https://doi.org/10.1016/j.jana.2012.03.001> PMID: 22516755



93. Faiz A. The promise of rural roads: Review of the role of low-volume roads in rural connectivity, poverty reduction, crisis management, and livability. Washington, D.C.: Transportation Research Board of the National Academies; 2012. Report No.: E-C167.
94. Albrecht D, Zamora G, Banister D, Valentine N, Dora C. Transport (road transport): shared interests in sustainable outcomes. Geneva, Switzerland: World Health Organization; 2011.
95. Vijay KS. Rural roads and the SDGs. New Dehli, India: The Energy and Resources Institute; 2019.
96. Cook J, Huizenga C, Petts R, Visser C, Yiu A. The contribution of rural transport to achieve the sustainable development goals. Research for COmmunity Access Partnership; 2017.
97. Iimi A, Ahmed F, Anderson EC, Diehl AS, Maiyo L, Peralta-Quirós T, et al. New Rural Access Index: Main Determinants and Correlation to Poverty. The World Bank; 2016. Report No.: 7876. <https://doi.org/10.1596/1813-9450-7876>
98. A survey of citizens' needs, stakeholder concerns and perceptions on infrastructure transparency and feedback on CoST Uganda interventions in 2017/18. Kampala, Uganda: CoST Uganda; 2019. Available: <https://www.cost.or.ug/wp-content/uploads/2019/05/CoST-Uganda-National-Survey-Report.pdf>.
99. Francis JM, Cook S, Morojele NK, Swahn MH. Rarity and limited geographical coverage of individual level alcohol interventions in sub Saharan Africa: findings from a scoping review. *J Subst Use.* 2020; 25: 11–19. <https://doi.org/10.1080/14659891.2019.1664662>
100. Nadkarni A, Garber A, Costa S, Wood S, Kumar S, MacKinnon N, et al. Auditing the AUDIT: A systematic review of cut-off scores for the Alcohol Use Disorders Identification Test (AUDIT) in low- and middle-income countries. *Drug Alcohol Depend.* 2019; 202: 123–133. <https://doi.org/10.1016/j.drugalcdep.2019.04.031> PMID: 31349205
101. Bronfenbrenner U. Ecological systems theory. Six theories of child development: Revised formulations and current issues. London, England: Jessica Kingsley Publishers; 1992. pp. 187–249. <https://doi.org/10.1111/j.1467-8624.1992.tb01638.x> PMID: 1611945
102. McLeroy KR, Bibeau D, Steckler A, Glanz K. An ecological perspective on health promotion programs. *Health Educ Q.* 1988; 15: 351–377. <https://doi.org/10.1177/109019818801500401> PMID: 3068205
